# Supplementary material
Source: Research Square preprint supplement (doi:10.21203/rs.3.rs-9323678/v1)
Supplement: Supplementary file 1 [file 42e3f10736878c9776b3a0c1.docx]

**VPS11 Promotes Ubiquitination-Dependent Degradation of TFEB to Orchestrate Autophagy-Lysosome Pathway Homeostasis and Anti-tumor Efficacy**

Huanmin Niua#, Xiaoxue Zhenga#, Yuhao Suna, Qi Suna, Qiqi Lua, Mengqi Jiaa*, Huiqing Yuana*

aKey Laboratory of Experimental Teratology of Ministry of Education, Institute of Medical Sciences, the Second Qilu Hospital of Shandong University, Jinan, China

#These authors contributed equally to this work.

*Correspondence:

Mengqi Jia, Email: jiamengqi@email.sdu.edu.cn

Huiqing Yuan, Email: lyuanhq@sdu.edu.cn

**Supplementary Figure and Supplementary Figure Legends**

**Supplementary Fig. 1 The protein expression of TFEB is downregulated under prolonged stress**


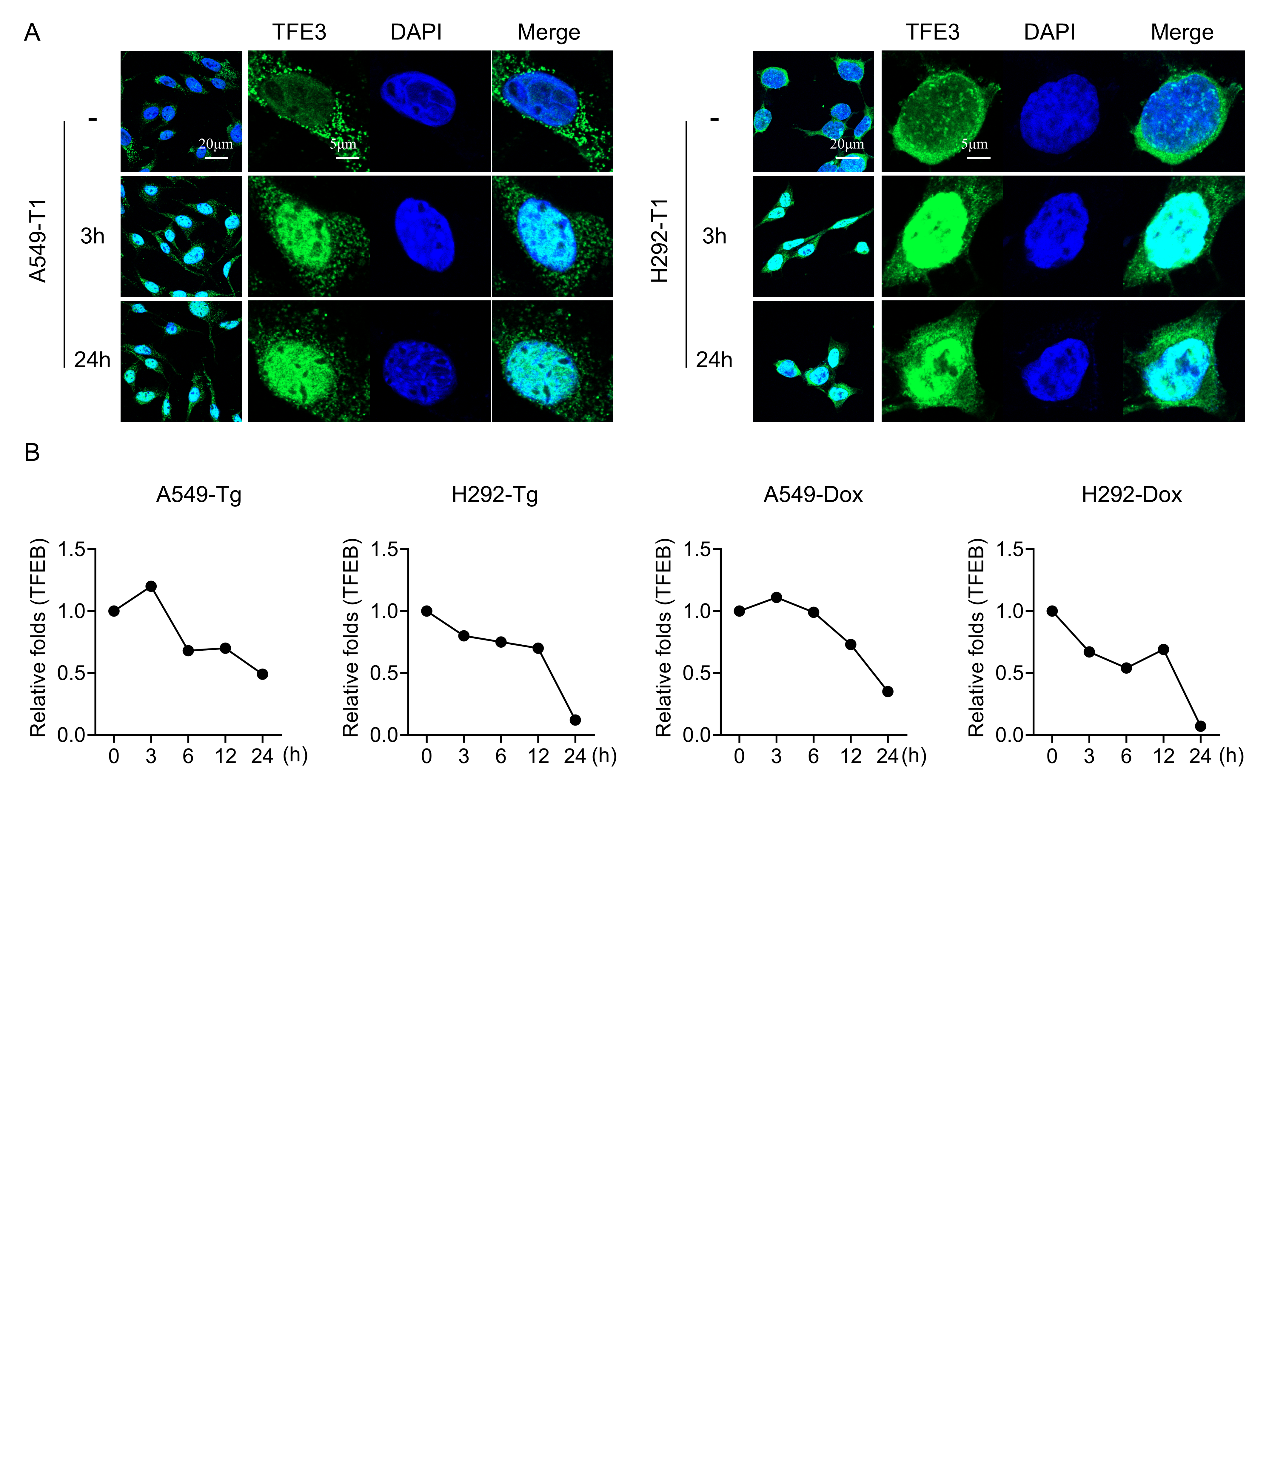


(A) The nuclear translocation and dynamic expression of TFE3 was examined by immunofluorescence at various time points following T1 treatment in A549 and H292 cells. (B) The dynamic expression of TFEB was statistically following Tg and Dox treatment in A549 and H292 cells.

**Supplementary Fig. 2 Excessive activation of TFEB is detrimental to the survival of tumor cells under prolonged stress**

**
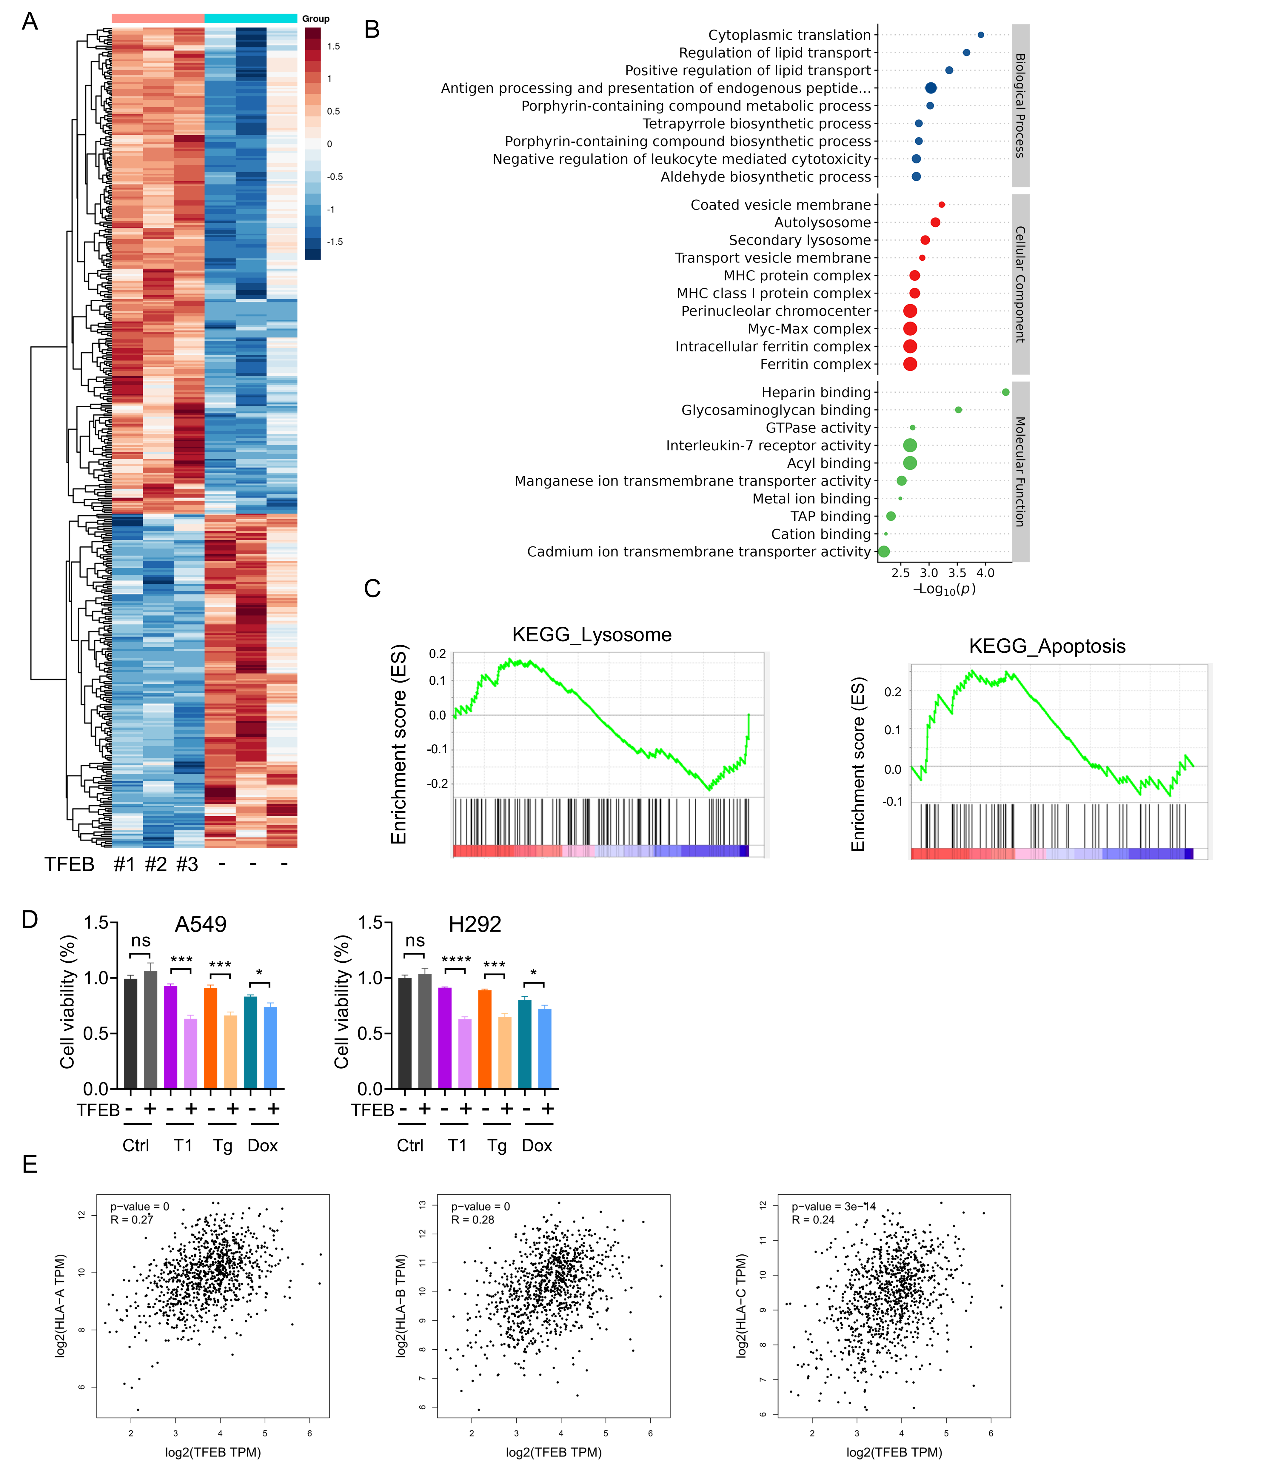
**

(A-C) Comprehensive quantitative proteomic analysis of TFEB overexpression in A549 cell. (A) Heatmap showing the differentially expressed proteins. (B) GO analysis of the top 10 significantly enriched pathways. (C) GSEA analysis of the lysosome and apoptosis pathway. (D) The CCK-8 assay was used to assess the survival rates of A549 and H292 lung tumor cells in response to T1, Tg, and Dox treatment following TFEB overexpression. (E) Correlation analysis between TFEB and HLA-A/B/C in lung cancer samples using the GEPIA (Gene Expression Profiling Interactive Analysis) database. Data are the mean ± SD; **P* < 0.05, ** *P* < 0.01, *** *P* < 0.001, and **** *P* < 0.0001.

**Supplementary Fig. 3 VPS11 is a novel negative regulator of TFEB**


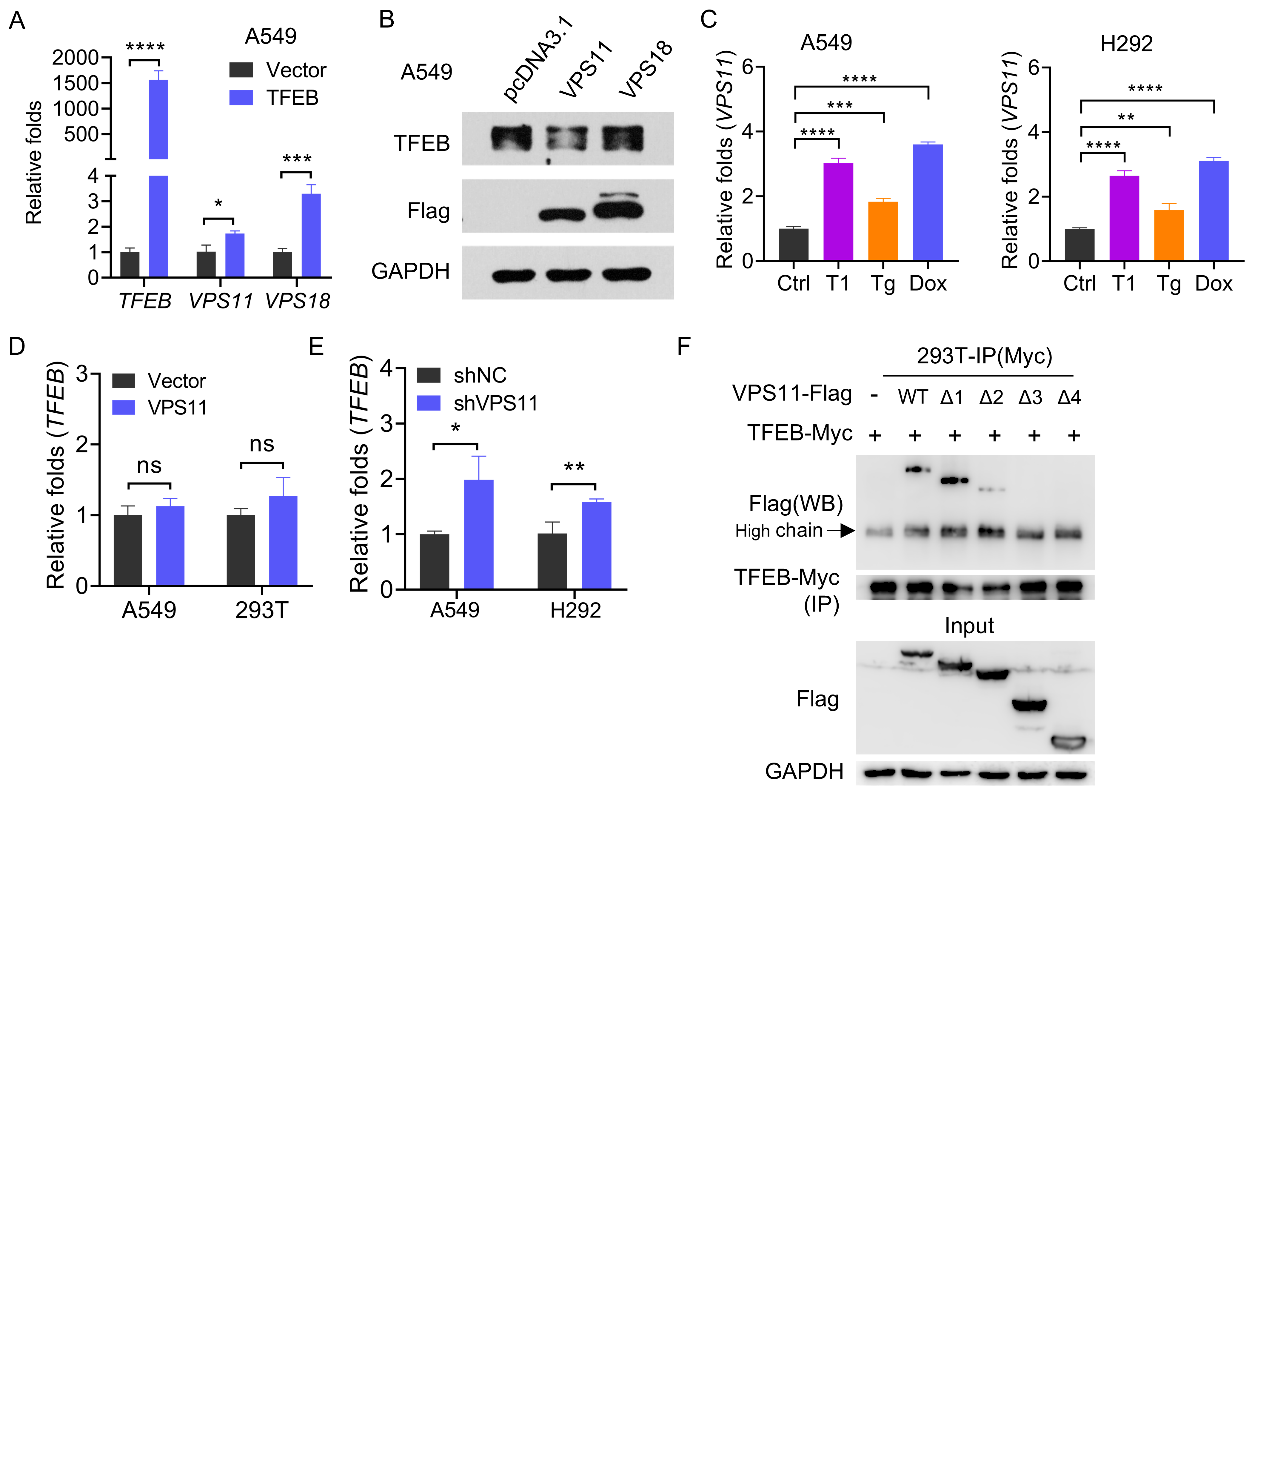


(A) qPCR analysis of VPS11 and VPS18 expression in TFEB-overexpressing A549 cell. (B) Western blot analysis of TFEB expression in VPS11or VPS18-overexpressing A549 cell. (C) The mRNA level of VPS11 was analyzed by qPCR in A549 and H292 cells following treatment with T1, Tg and Dox. (D) qPCR analysis of TFEB expression in VPS11-overexpressing A549 and 293T cells. (E) qPCR analysis of TFEB expression in VPS11-knockdown A549 and H292 cells. (F) 293T cell was co-transfected with TFEB-Myc and VPS11-Flag mutant plasmids, and subjected to IP for Myc antibody. Data are the mean ± SD; **P* < 0.05, ** *P* < 0.01, *** *P* < 0.001, and **** *P* < 0.0001.

**Supplementary Fig. 4. VPS11 knockdown inhibits tumor growth by disrupting the autophagy–lysosome pathway**

**
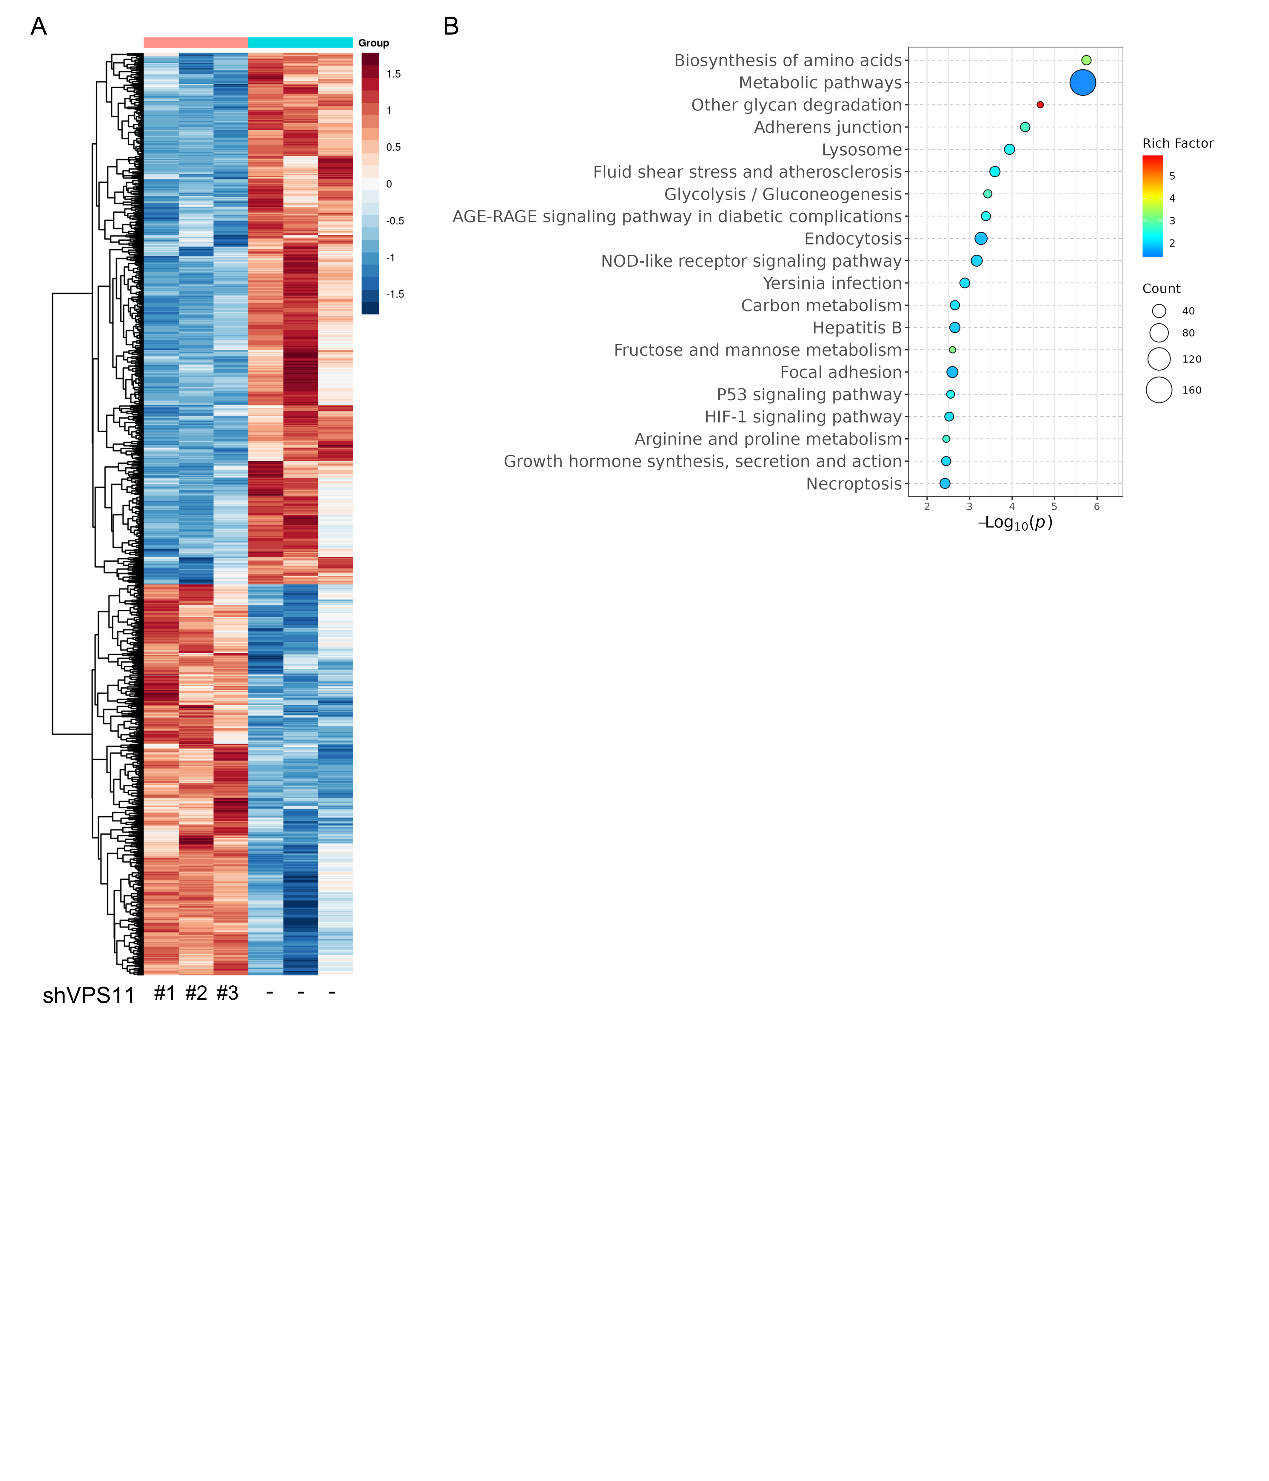
**

(A and B) Comprehensive quantitative proteomic analysis of VPS11 knockdown in A549 cell. (A) Heatmap showing the differentially expressed proteins. (B) GO analysis of the top 20 significantly enriched pathways.

**Supplementary** Table1: Antibodies and reagents

| Antibodies Name | Source | Catalogue no. | Dilution |
| --- | --- | --- | --- |
| Mouse anti-GAPDH | Santa Cruz Biotechnology | sc-365062 | 1:2000 (WB) |
| Mouse anti-β-Actin | Sigma | A5441 | 1:4000 (WB) |
| Mouse anti-Myc tag | MBL Life science | M192-3 | 1:4000 (WB) |
| Mouse anti-Flag tag | MBL Life science | M185-3 | 1:4000 (WB) |
| Mouse anti-HA tag | MBL Life science | M180-3 | 1:4000 (WB) |
| Rabbit anti-TFEB | Cell Signaling Technology | 37785 | 1:500 (WB) |
| Mouse anti-TFEB | Cell Signaling Technology | 91765 | 1:200 (IF) |
| Rabbit anti-TFE3 | Cell Signaling Technology | 14779S | 1:1000 (WB) |
| Rabbit anti-TFE3 | Proteintech | 14480-1-AP | 1:200 (IF) |
| Rabbit anti-mTORC1 | Cell Signaling Technology | 2983S | 1:500 (WB) |
| Rabbit anti-p-mTORC1(Ser2448) | Cell Signaling Technology | 5536S | 1:500 (WB) |
| Mouse anti-VPS11 | Santa Cruz Biotechnology | sc-515094 | 1:500 (WB) |
| Rabbit anti-GRP78 | Proteintech | 11587-1-AP | 1:1000 (WB) |
| Mouse anti-gamma H2A.X (phospho S139) | Abcam | Ab26530 | 1:2000 (WB) |
| Rabbit anti- Histone H3 | Cell Signaling Technology | 4499 | 1:3000 (WB) |
| Rabbit anti- MHC-I | Proteintech |  |  |
| Ki67 antibody | ZGSB- Biotechnology | ZM-0166 | 1:500 (IHC) |
| PE-anti-human HLA-A/B/C | Biolegend | 311406 | 1:200 (Flow) |
| PerCP/Cyanine5.5 anti-mouse CD45 | Biolegend | 103132 | 1:200 (Flow) |
| FITC anti-mouse CD3 | Biolegend | 100204 | 1:200 (Flow) |
| APC anti-mouse CD8a | Biolegend | 100712 | 1:200 (Flow) |
| PE/Cyanine7 anti-human/mouse Granzyme B | Biolegend | 396410 | 1:100 (Flow) |
| PE/Cyanine7 anti- mouse IFNγ | Biolegend | 505808 | 1:100 (Flow) |
| CCK8 | Beyotime Biotechnology | C0037 | 1:10 |
| Torin1 (T1) | Slleck | S2827 | 0.5 μM |
| Thapsigargin (Tg) | Slleck | S7895 | 0.5 μM |
| Doxorubicin (Dox) | Slleck | E2516 | 0.2 μM |
| Cycloheximide (CHX) | Selleck | S7418 | 20 μM |
| Mg-132 | MedChemExpress | HY-13259 | 0.5 μM |

**Supplementary** Table2: Primer

| Gene *(Human)* | Forward primer | Reverse primer |
| --- | --- | --- |
| *β-actin* | CATGTACGTTGCTATCCAGGC | CTCCTTAATGTCACGCACGAT |
| *VPS11* | CAATCCACTCTGCACTCGAAT | CGGGTGATGTCTCCTTTGTTCA |
| *VPS18* | CACTCGGGGTATGTGAATGCC | TCGGAAGGGGTGAAGTCAATG |
| *TFEB* | ACCTGTCCGAGACCTATGGG | CGTCCAGACGCATAATGTTGT |
| *HLA-A* | ATACCTGGAGAACGGGAAGGA | GAGATGGGGTGGTGGGTCATA |
| *HLA-B* | CAGTTCGTGAGGTTCGACAG | CAGCCGTACATGCTCTGGA |
| *HLA-C* | CCATGAGGTATTTGTGGACCG | TCTCGGACTCTCGTCGTCG |
